# Supplementary material
Source: PubMed Central journal article supplement (PMC4138204)
Supplement: supp_jlb.3AB0114-046RR_jlb.3AB0114-046RRSuppData.pdf [file supp_jlb.3AB0114-046RR_jlb.3AB0114-046RRSuppData.pdf]

## Supplementary Figures

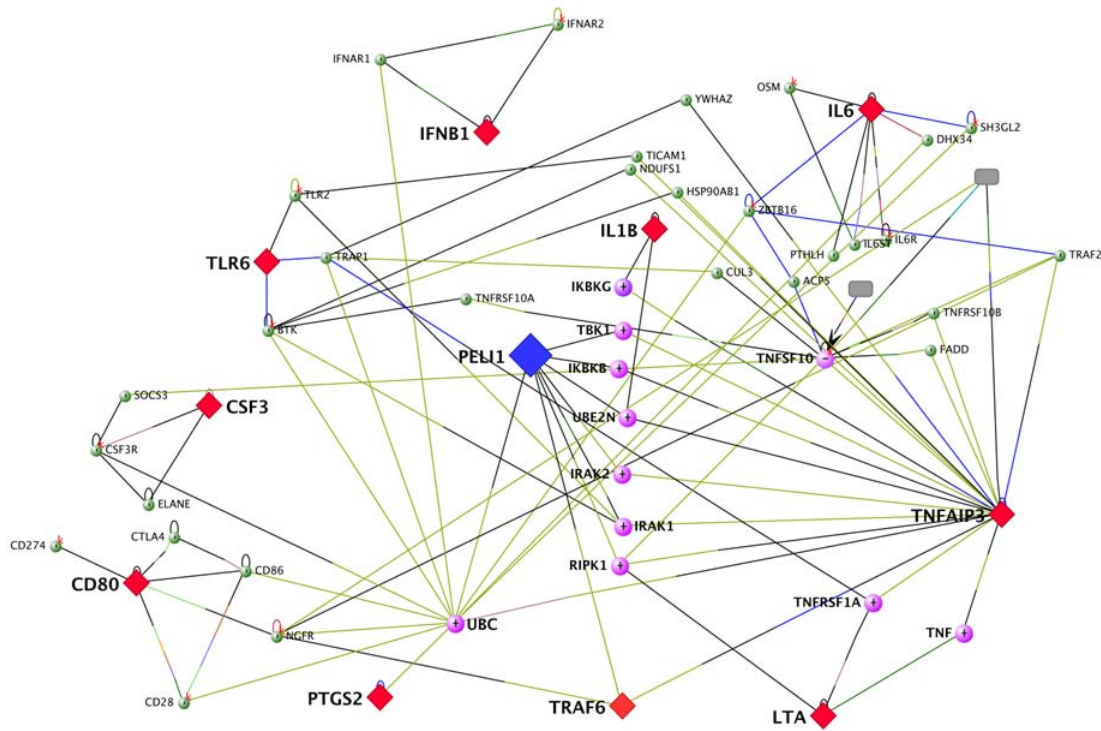

**Supplementary Figure 1.** Interaction of genes identified in TLR array. VisANT was used to determine protein interactions for genes up-regulated with 1MT treatment (red diamond) with peli1 (blue diamond). Connections shown are representative of known protein interactions of Homo sapiens since more data exists as compared to Mus musculus.

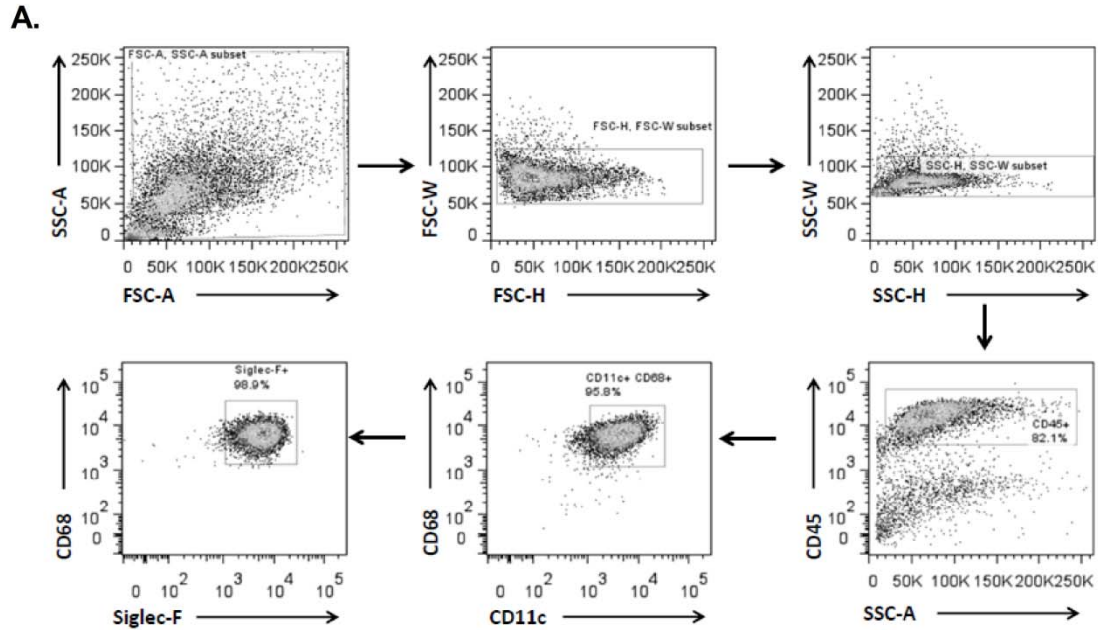

**B.**

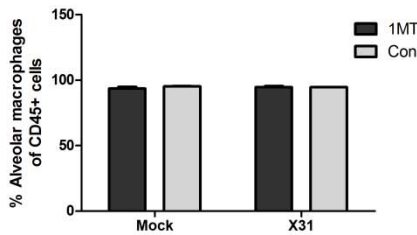

**C.**

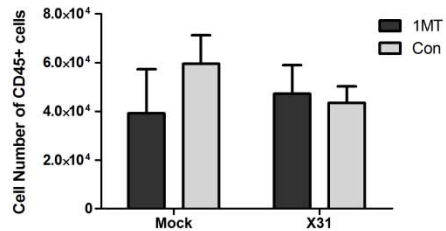

**Supplementary Figure 2.** Alveolar macrophage phenotyping and purity. Mice were pretreated with 1MT or Con water for 3 days prior to intranasal infection with  $10^3$  PFU of X31 or mock infected. Alveolar macrophages were isolated from BAL collected 24h post-infection. (A) Representative dot plots of the isolated cell population from BAL. (B) Percentage and (C) frequency of the alveolar macrophage population isolated from the BAL.
